# Supplementary material
Source: publisher site journal article supplement (http://kjim.org/upload/media/kjim-2023-222-Supplementary-Fig-1.pdf)
Supplement: Supplementary file 1 [file kjim-2023-222-Supplementary-Fig-1.pdf]

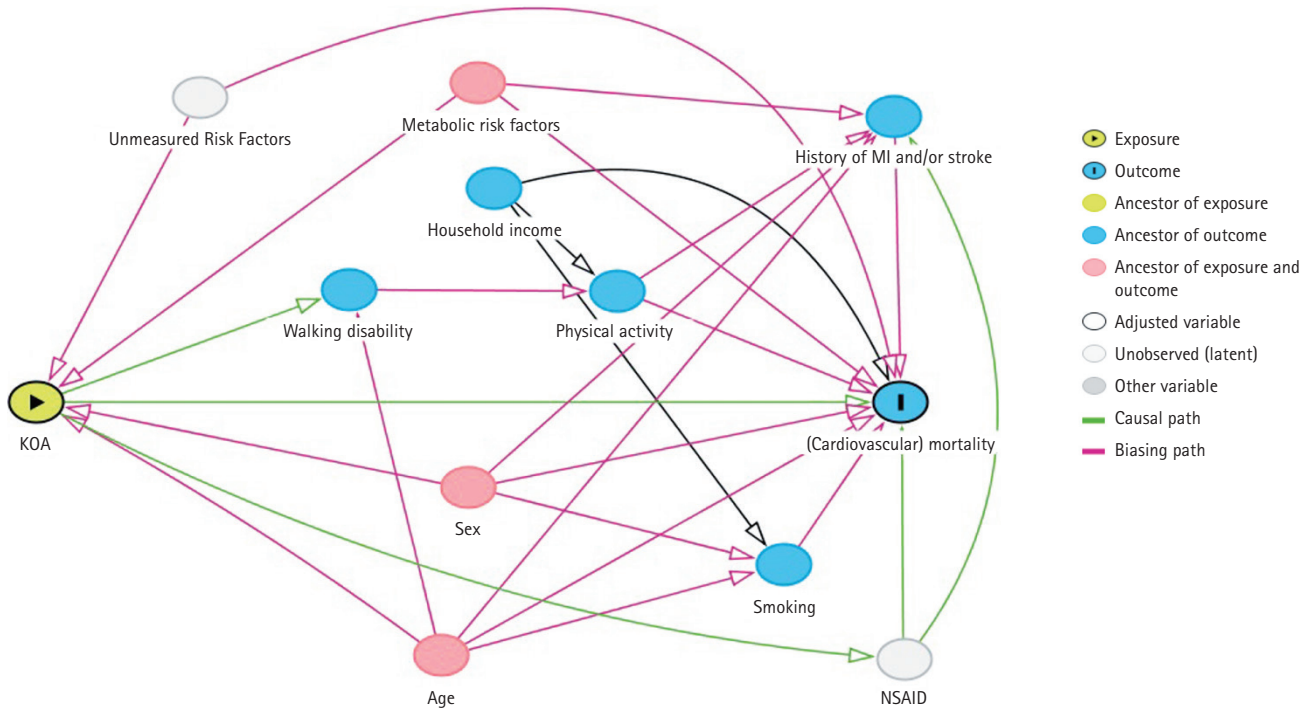

**Supplementary Figure 1.** Causal diagram based on directed acyclic graph in this study. KOA, knee osteoarthritis; MI, myocardial infarction; NSAID, nonsteroid anti-inflammatory drugs.
